# Supplementary material for: COVID-19 seroprevalence among hospital staff and preprocedural patients in Thai community hospitals: a cross-sectional study
Source: PubMed Central journal article supplement — BMJ Open. 2021 Oct 29;11(10):e046676. doi: 10.1136/bmjopen-2020-046676 (PMC8559109; doi:10.1136/bmjopen-2020-046676), 2021-10-29
Supplement: bmjopen-2020-046676supp001.pdf [file bmjopen-2020-046676supp001.pdf]

### COVID-19 Antibody in Thai Community Hospitals

#### SUPPLEMENTARY FILES

**Supplemental Table E1** Geographical distribution of 52 participating community hospitals

|              | Participating<br>Provinces | Total<br>Provinces | Population of<br>Participating Provinces | Population of<br>All Provinces |
|--------------|----------------------------|--------------------|------------------------------------------|--------------------------------|
| Thailand*    | 35 (46.1%)                 | 76                 | 35,416,545 (58.2%)                       | 60,892,671                     |
| Northern     | 3 (33.3%)                  | 9                  | 2,505,118 (39.4%)                        | 6,350,499                      |
| Northeastern | 11 (55.0%)                 | 20                 | 15,064,919 (68.4%)                       | 22,014,248                     |
| Central*     | 13 (50.0%)                 | 26                 | 10,053,397 (55.3%)                       | 18,192,361                     |
| Southern     | 6 (42.9%)                  | 14                 | 5,697,112 (60.0%)                        | 9,493,757                      |
| Eastern      | 2 (28.6%)                  | 7                  | 2,095,999 (43.3%)                        | 4,841,806                      |

\* Not include Bangkok which has no community hospital.  
Data were presented in counts and percentages.

**Supplemental Table E2** Number and prevalence of PCR confirmed COVID-19 cases in participating provinces

|                  | <b>PCR<br/>Confirmed<br/>COVID-19<br/>Cases</b> | <b>Population</b> | <b>PCR Confirmed COVID-19<br/>Prevalence per 100,000<br/>Population</b> |
|------------------|-------------------------------------------------|-------------------|-------------------------------------------------------------------------|
| Overall          | 864                                             | 35,416,545        | 2.44                                                                    |
| Northern         | 47                                              | 2,505,118         | 1.88                                                                    |
| Chiang Mai       | 41                                              | 1,779,254         | 2.30                                                                    |
| Mae Hong Son     | 5                                               | 284,138           | 1.76                                                                    |
| Phrae            | 1                                               | 441,726           | 0.23                                                                    |
| Northeastern     | 85                                              | 15,064,919        | 0.56                                                                    |
| Buriram          | 13                                              | 1,595,747         | 0.81                                                                    |
| Chaiyaphum       | 3                                               | 1,137,357         | 0.26                                                                    |
| Kalasin          | 3                                               | 983,418           | 0.31                                                                    |
| Khon Kaen        | 6                                               | 1,802,872         | 0.33                                                                    |
| Maha Sarakham    | 1                                               | 962,665           | 0.10                                                                    |
| Mukdahan         | 4                                               | 353,174           | 1.13                                                                    |
| Nakhon Phanom    | 2                                               | 719,136           | 0.28                                                                    |
| Nakhon           | 19                                              | 2,648,927         | 0.72                                                                    |
| Ratchasima       |                                                 |                   |                                                                         |
| Surin            | 9                                               | 1,396,831         | 0.64                                                                    |
| Ubon Ratchathani | 15                                              | 1,878,146         | 0.80                                                                    |
| Udon Thani       | 10                                              | 1,586,646         | 0.63                                                                    |
| Central          | 383                                             | 10,053,397        | 3.81                                                                    |
| Ayutthaya        | 4                                               | 820,188           | 0.49                                                                    |
| Chainat          | 0                                               | 326,611           | 0.00                                                                    |
| Lopburi          | 2                                               | 755,556           | 0.26                                                                    |
| Nakhon Pathom    | 22                                              | 920,030           | 2.39                                                                    |
| Nonthaburi       | 158                                             | 1,265,387         | 12.49                                                                   |
| Pathum Thani     | 39                                              | 1,163,604         | 3.35                                                                    |
| Phetchaburi      | 2                                               | 485,191           | 0.41                                                                    |
| Phichit          | 0                                               | 536,311           | 0.00                                                                    |
| Samut Prakan     | 143                                             | 1,344,875         | 10.63                                                                   |
| Sukhothai        | 3                                               | 595,072           | 0.50                                                                    |
| Suphanburi       | 6                                               | 846,334           | 0.71                                                                    |
| Tak              | 3                                               | 665,620           | 0.45                                                                    |
| Uthaithani       | 1                                               | 328,618           | 0.30                                                                    |
| Southern         | 212                                             | 5,697,112         | 3.72                                                                    |
| Chumphon         | 21                                              | 511,304           | 4.11                                                                    |
| Krabi            | 20                                              | 476,739           | 4.20                                                                    |
| Nakhon Si        | 12                                              | 1,561,927         | 0.77                                                                    |
| Thammarat        |                                                 |                   |                                                                         |
| Songkhla         | 134                                             | 1,435,968         | 9.33                                                                    |
| Surat Thani      | 18                                              | 1,068,010         | 1.69                                                                    |
| Trang            | 7                                               | 643,164           | 1.09                                                                    |
| Eastern          | 137                                             | 2,095,999         | 6.54                                                                    |
| Chanthaburi      | 3                                               | 537,698           | 0.56                                                                    |
| Chonburi         | 134                                             | 1,558,301         | 8.60                                                                    |

PCR, polymerase chain reaction.
